# Supplementary material for: Molecular and functional heterogeneity of IL-10-producing CD4+ T cells
Source: PubMed Central journal article supplement (PMC6303294; doi:10.1038/s41467-018-07581-4), 2018-12-21
Supplement: 41467_2018_7581_MOESM1_ESM.pdf [file 41467_2018_7581_MOESM1_ESM.pdf]

# **Molecular and functional heterogeneity of IL-10-producing CD4<sup>+</sup> T cells**

Brockmann et al.

Supplementary Information

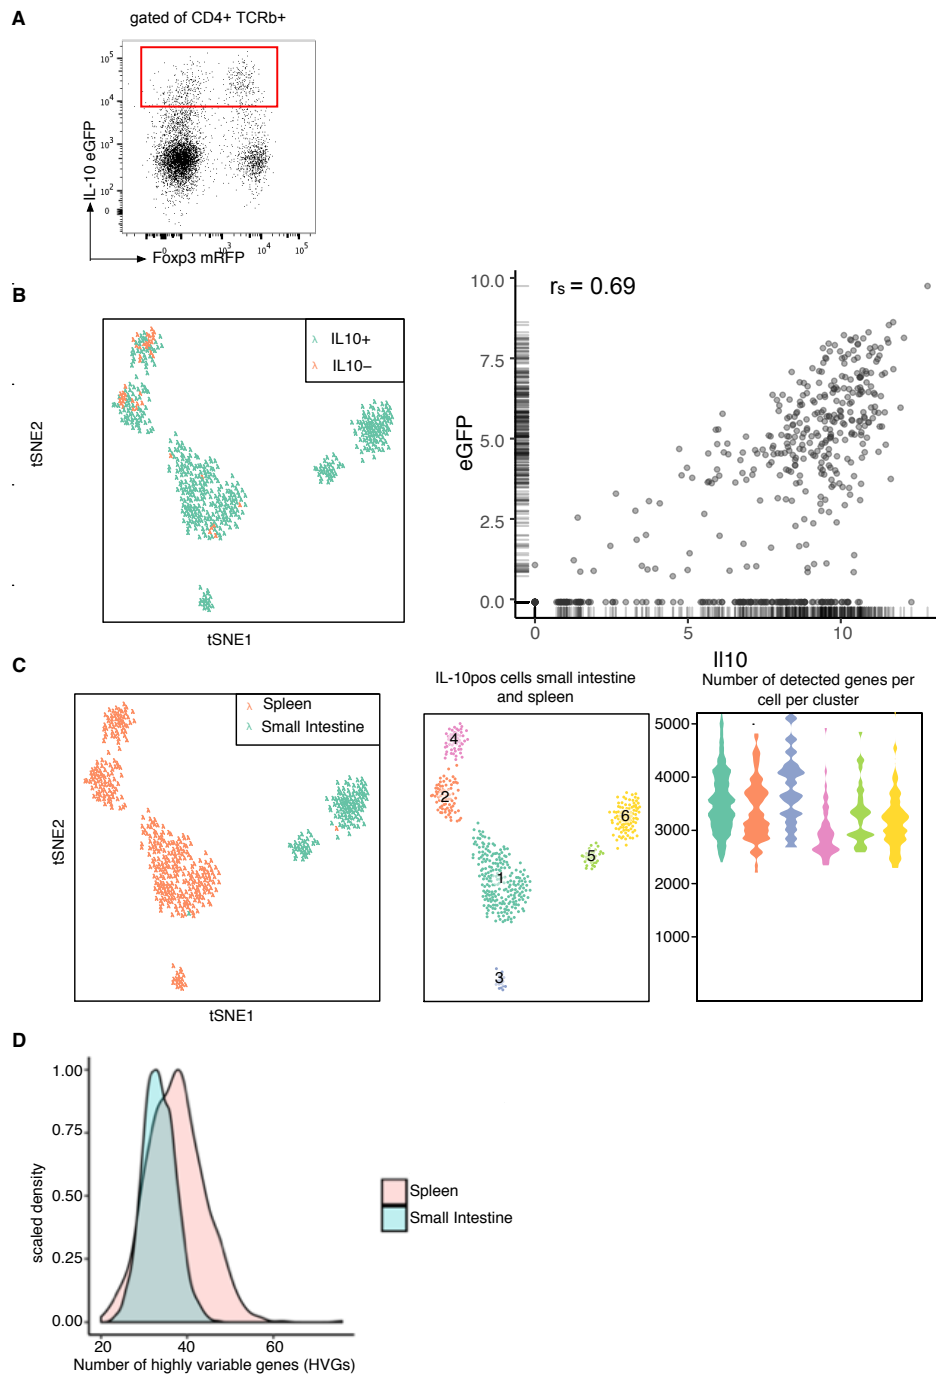

**Supplementary Figure 1. IL-10-producing Foxp3<sup>Neg</sup> CD4<sup>+</sup> T cells are transcriptionally heterogeneous.** **A)** Representative dot plot of IL-10<sup>eGFP</sup> and Foxp3<sup>mRFP</sup> expression in CD4<sup>+</sup> T cells. Red gate indicates which cells were sorted for single cell sequencing analysis. **B)** Expression of *Il10* and correlation between *Il10* and *Gfp* expression. **C)** *t*-SNE analysis of single cell RNA sequencing (plate-based) of IL-10pos cells (including Foxp3<sup>+</sup> Treg) isolated from small intestine or spleen of aCD3-treated IL-10<sup>eGFP</sup> x Foxp3<sup>mRFP</sup> double reporter mice. **D)** Bootstrap analysis of HVGs in single cell RNA sequencing data of IL-10pos cells from small intestine and spleen.

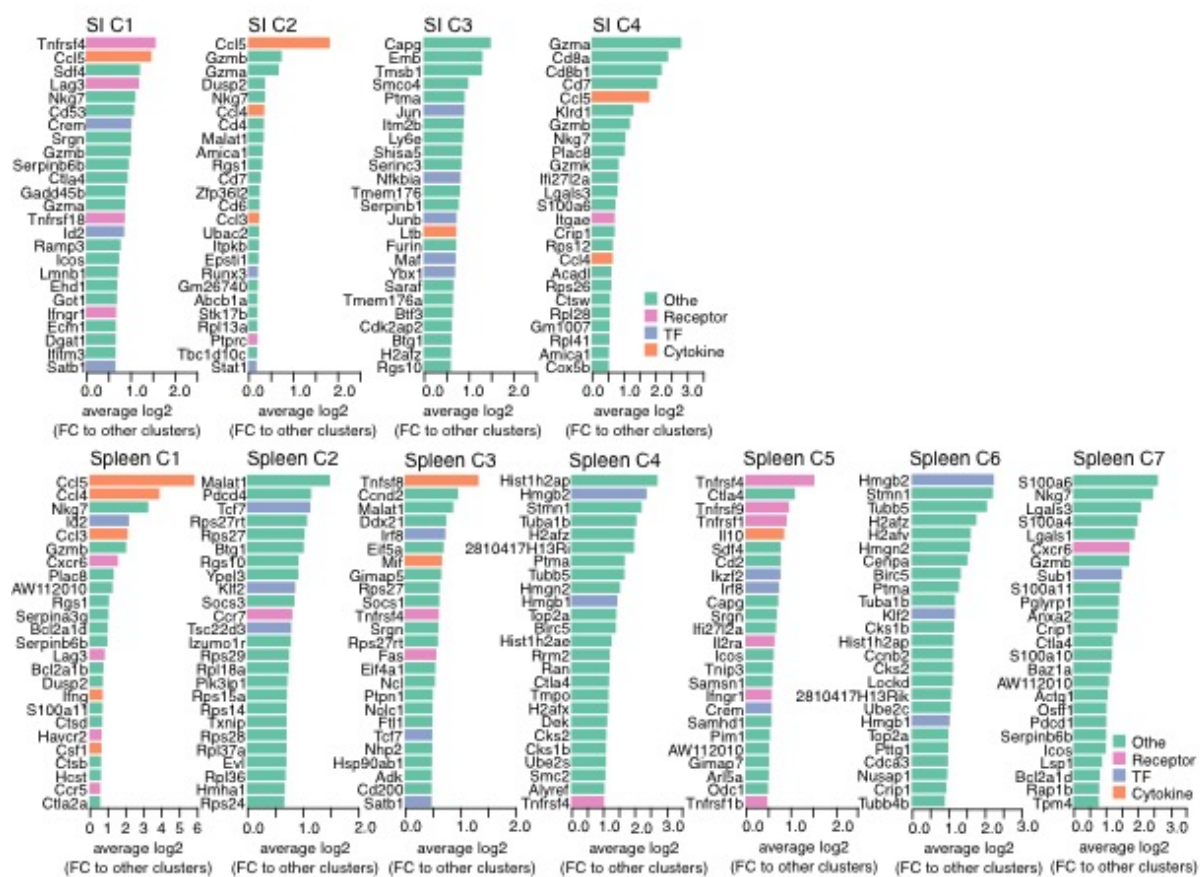

**Supplementary Figure 2. Fold change analysis of 10X single cell RNA sequencing of IL-10-producing CD4<sup>+</sup> T from spleen and small intestine. Fold change (FC) of each cluster compared to other clusters. 20 most enriched genes for each cluster are shown.**

### Transient small intestinal inflammation model

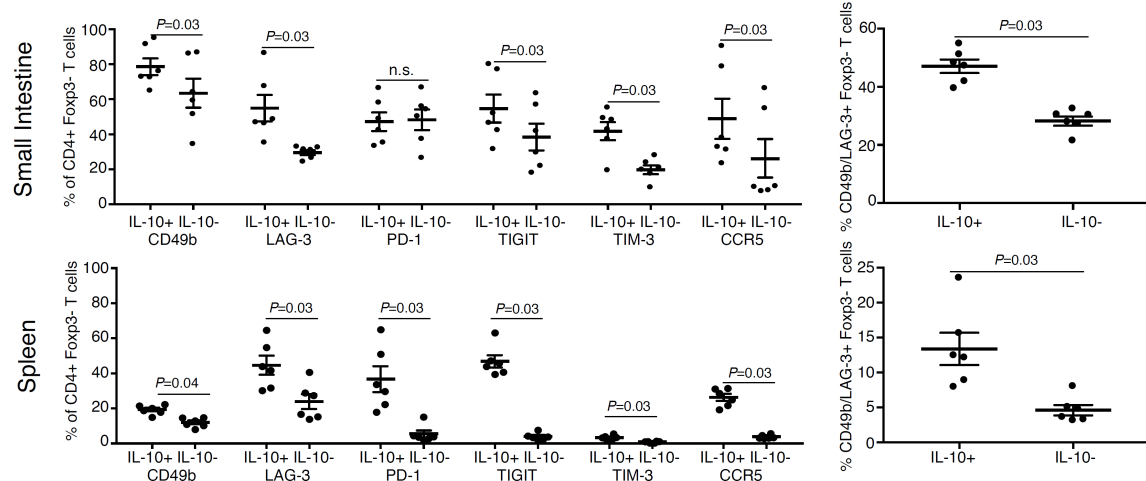

### Steady State

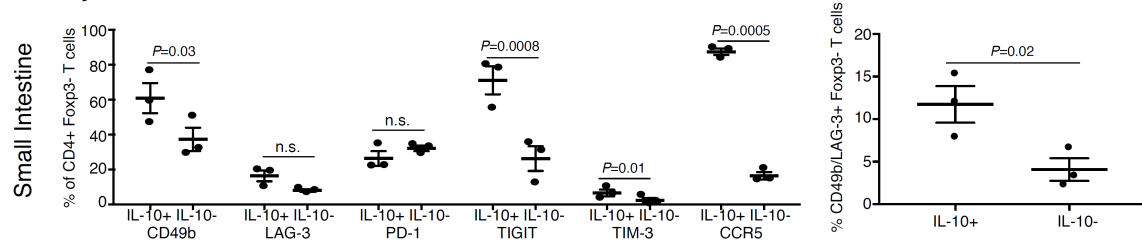

### *P. berghei* infection

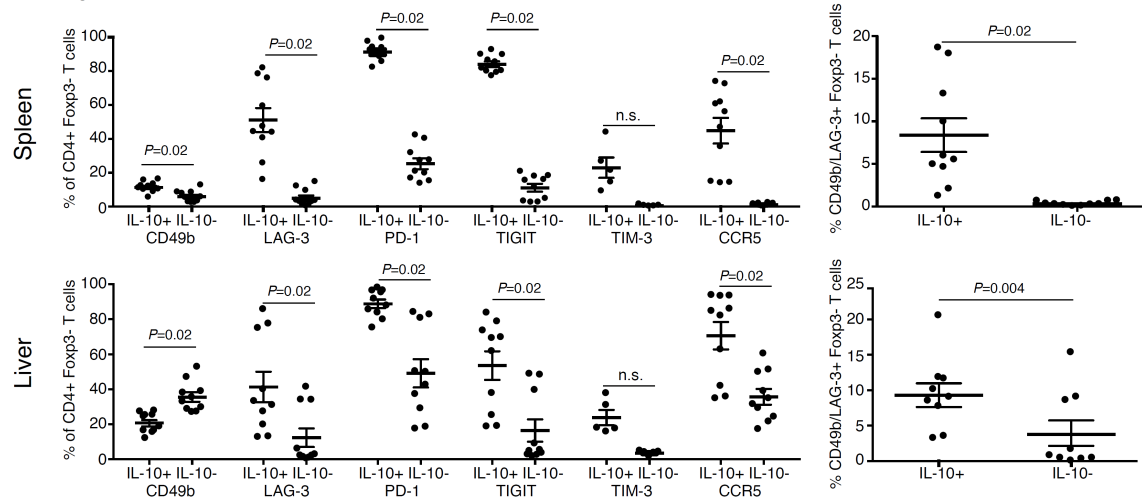

### Supplementary Figure 3. Co-inhibitory receptors and $T_R1$ -associated markers are differentially expressed on IL-10-producing $CD4^+$ T cells and IL-10 negative T cells.

Analysis of cells from small intestine and spleen of aCD3-treated IL-10eGFP x Foxp3mRFP double reporter mice (n=6). Data are cumulative of two independent experiments. Analysis of untreated IL-10<sup>eGFP</sup> x Foxp3<sup>mRFP</sup> double reporter mice (n=3). Data are representative of three independent experiments. Analysis of *P. berghei* infected IL-10<sup>eGFP</sup> x Foxp3<sup>mRFP</sup> double reporter mice (n=10). Data are cumulative of three independent experiments. A paired t-test was used to calculate significance.

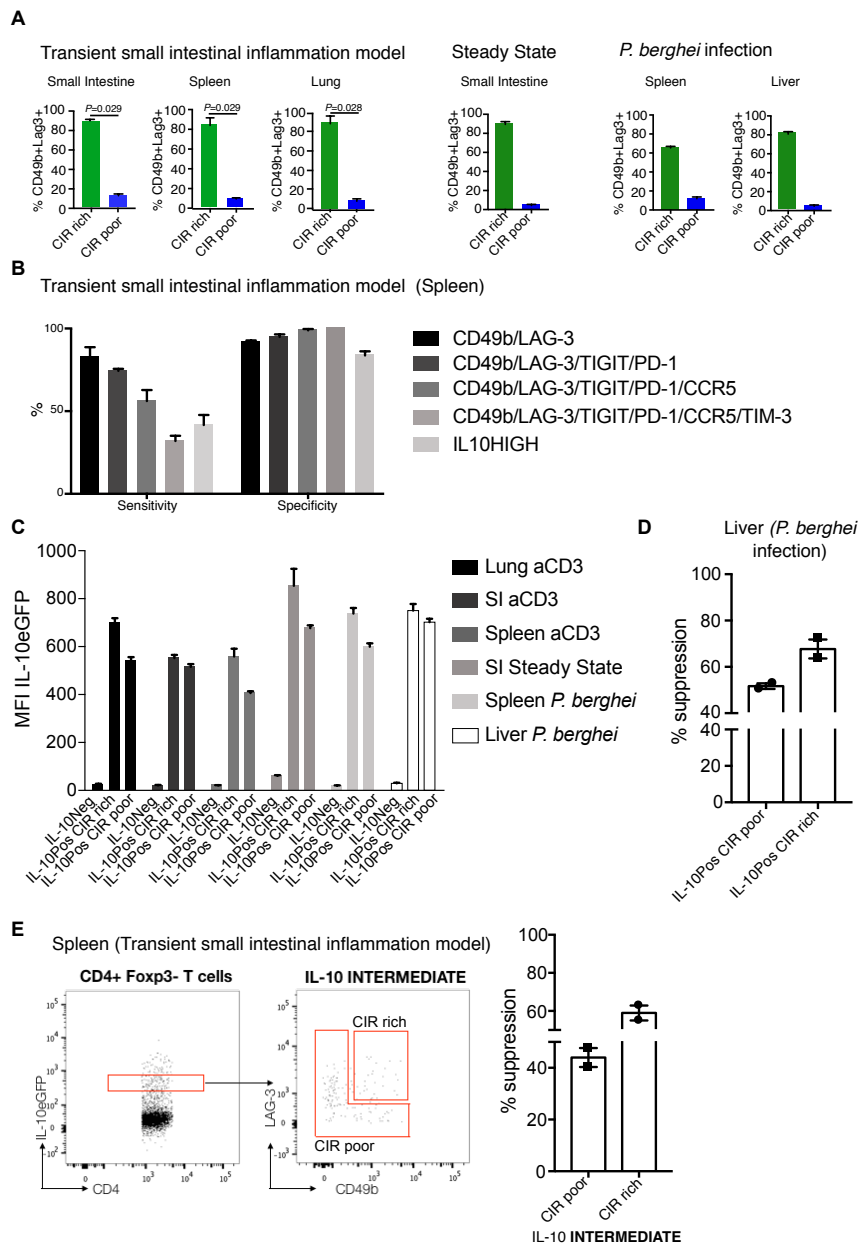

**Supplementary Figure 4. CD49b/LAG-3 expression is strongly enriched within the IL-10-producing Foxp3<sup>Neg</sup> CIR rich subpopulation and their superior suppressive capacity is independent of IL-10 expression** **A)** Analysis of CD49b/LAG-3 co-expression in CIR rich and CIR poor subpopulations in indicated organs and disease models. **B)** Sensitivity and specificity was calculated for indicated marker combinations in IL-10-producing Foxp3<sup>Neg</sup> CD4<sup>+</sup> T cells derived from spleen of aCD3-treated IL-10eGFP x Foxp3mRFP double reporter mice. **C)** MFI of IL-10<sup>eGFP</sup> assessed in IL-10-producing Foxp3<sup>Neg</sup> CIR rich and CIR poor cells based on the analysis displayed in Figure 3A-C. Lymphocytes were isolated from spleen, lung and small intestine of aCD3-treated IL-10<sup>eGFP</sup> x Foxp3<sup>mRFP</sup> reporter mice. Additionally, cells were isolated from small intestine under steady state conditions and from spleen and liver of *P. berghei* infected mice. **D)** *In vitro* suppression of IL-10-producing Foxp3<sup>Neg</sup> CIR rich and CIR poor CD4<sup>+</sup> T cells isolated from liver of *P. berghei* infected IL-10<sup>eGFP</sup> x Foxp3<sup>mRFP</sup> reporter mice. Results are cumulative of two independent experiments. **E)** Representative gating strategy is shown (left). *In vitro* suppression of IL-10<sup>INTERMEDIATE</sup> Foxp3<sup>Neg</sup> CIR rich and CIR poor cells isolated of spleen of aCD3-treated IL-10<sup>eGFP</sup> x Foxp3<sup>mRFP</sup> reporter mice. Data are cumulative of two independent experiments.

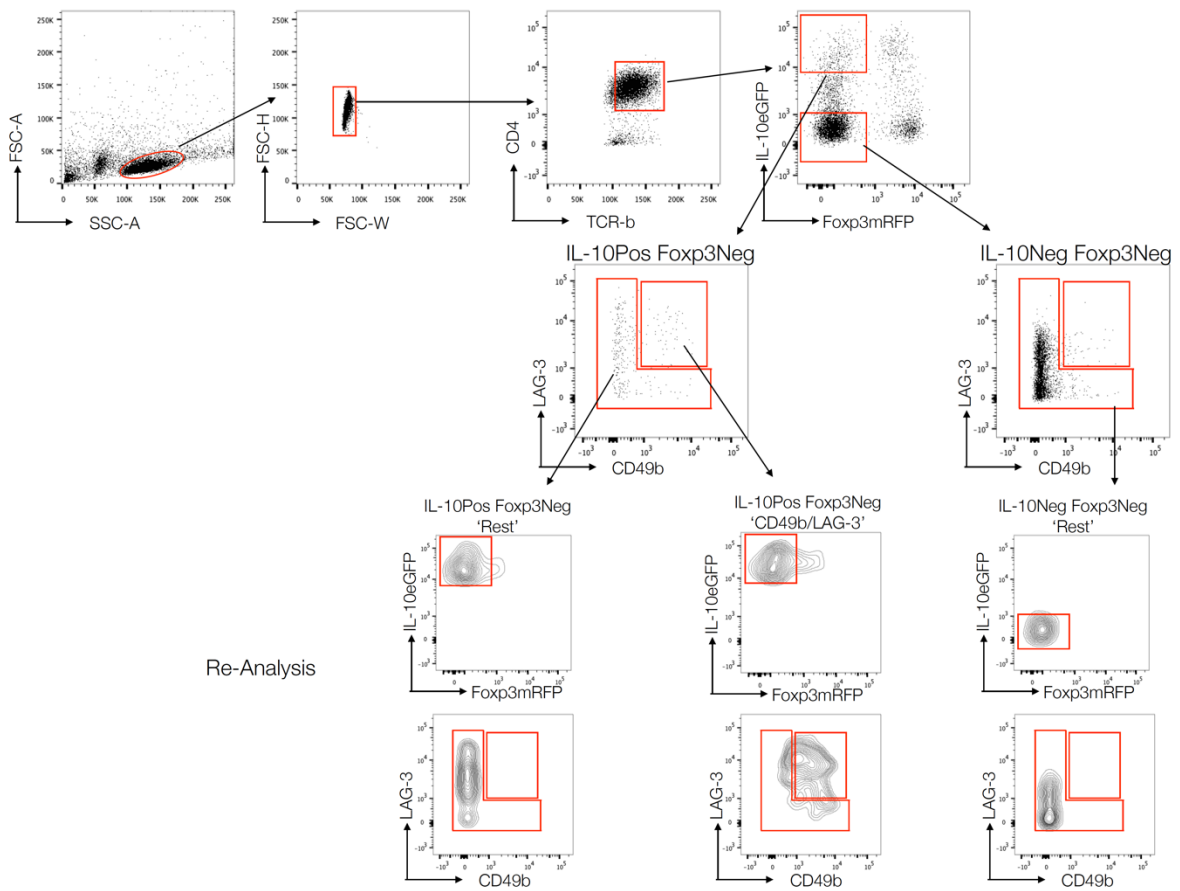

**Supplementary Figure 5. Gating strategy used for analysis and sorting of IL-10-producing Foxp3<sup>Neg</sup> CIR rich and CIR poor CD4<sup>+</sup> T cells.** Representative gating strategy of indicated populations is depicted in red as used in Figure 1D-F (IL-10pos Foxp3Neg cells), Figure 3 (IL-10pos, Foxp3Neg cells), Figure 4 (IL10pos CIR rich and CIR poor, IL10Neg CIR poor) and Figure 5A-C (IL10pos CIR rich and poor, IL-10Neg CIR poor). The representative plots show re-analysis of sorted populations.

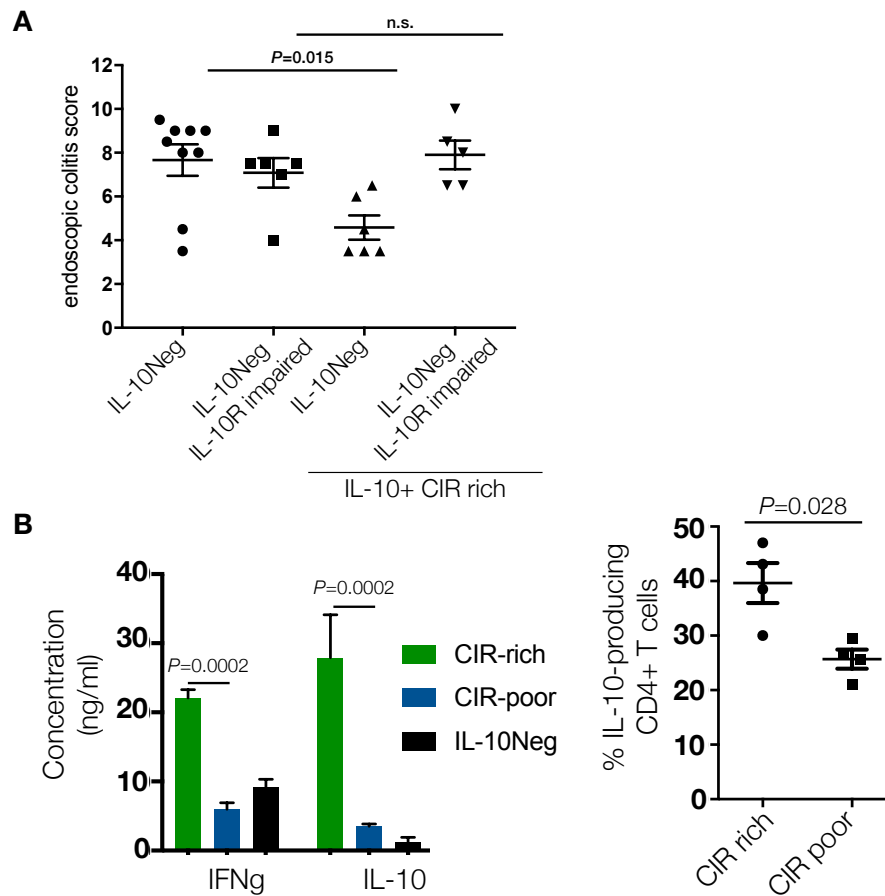

**Supplementary Figure 6. Suppressive capacity of CIR rich cells is dependent on IL-10 during colitis *in vivo*.** **A)** CIR rich IL-10-producing Foxp3<sup>Neg</sup> CD4<sup>+</sup> T cells, IL-10<sup>Neg</sup> CD4<sup>+</sup> T cells and IL-10R impaired IL-10<sup>Neg</sup> CD4<sup>+</sup> T cells were isolated from spleen of aCD3-treated IL-10<sup>eGFP</sup> x Foxp3<sup>mRFP</sup> reporter mice or IL-10<sup>eGFP</sup> x Foxp3<sup>mRFP</sup> IL-10R DN mice (IL-10R impaired). IL-10-producing CIR rich were co-transferred with IL-10<sup>Neg</sup> CD4<sup>+</sup> T cells or IL-10R impaired IL-10<sup>Neg</sup> CD4<sup>+</sup> T cells and colitis development was assessed by endoscopic colitis score 3 weeks upon transfer (IL-10Neg n=9; IL-10Neg IL-10R impaired n=6; IL-10Neg+CIR-rich n=6; IL-10Neg IL-10R impaired + CIR-rich n=5; lines indicate mean +/- SEM). Results are cumulative of three independent experiments. One-way ANOVA (post-test Tukey) was used to calculate significance. **B)** IL-10-producing Foxp3<sup>Neg</sup> CIR rich and CIR poor cells were isolated from spleen of aCD3-treated IL-10<sup>eGFP</sup> x Foxp3<sup>mRFP</sup> reporter mice. Cells were re-stimulated with plate-bound aCD3 antibody and soluble CD28 antibody for 72 hours. IL-10<sup>eGFP</sup> expression was assessed as well as cytokine concentration in the cell supernatant. Data are cumulative of four independent experiments. Mann Whitney test was used to calculate significance.

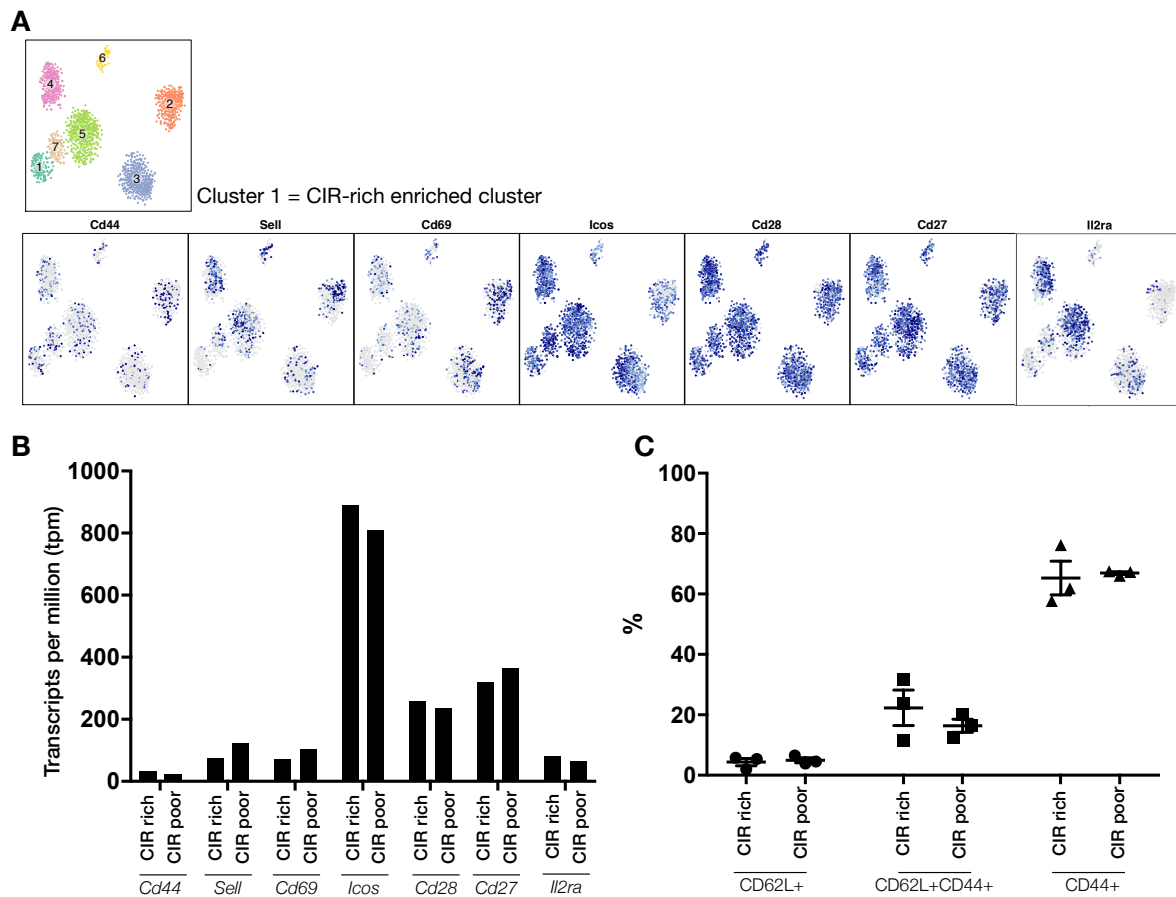

**Supplementary Figure 7. Analysis of activation markers in single cell sequencing and FACS data. A)** *t*-SNE analysis of single cell RNA sequencing of IL-10-producing cells (including Foxp3<sup>+</sup> cells) isolated from spleen of aCD3-treated IL-10<sup>eGFP</sup> x Foxp3<sup>mRFP</sup> reporter mice. Expression of indicated genes within cells of *t*-SNE analysis. Cluster 1 is enriched for CIR rich cells (see Figure 5). **B)** Transcripts per million (tpm) of indicated activation markers in transcriptome analysis of FACS-sorted CIR rich and CIR poor cells isolated from spleen from aCD3-treated IL-10<sup>eGFP</sup> x Foxp3<sup>mRFP</sup> reporter mice. **C)** Protein expression of CD62L and CD44 was analysis by flow cytometry in IL-10-producing Foxp3<sup>Neg</sup> CIR rich and CIR poor cells isolated from spleen of aCD3-treated IL-10<sup>eGFP</sup> x Foxp3<sup>mRFP</sup> reporter mice. Data are cumulative of two independent experiments.



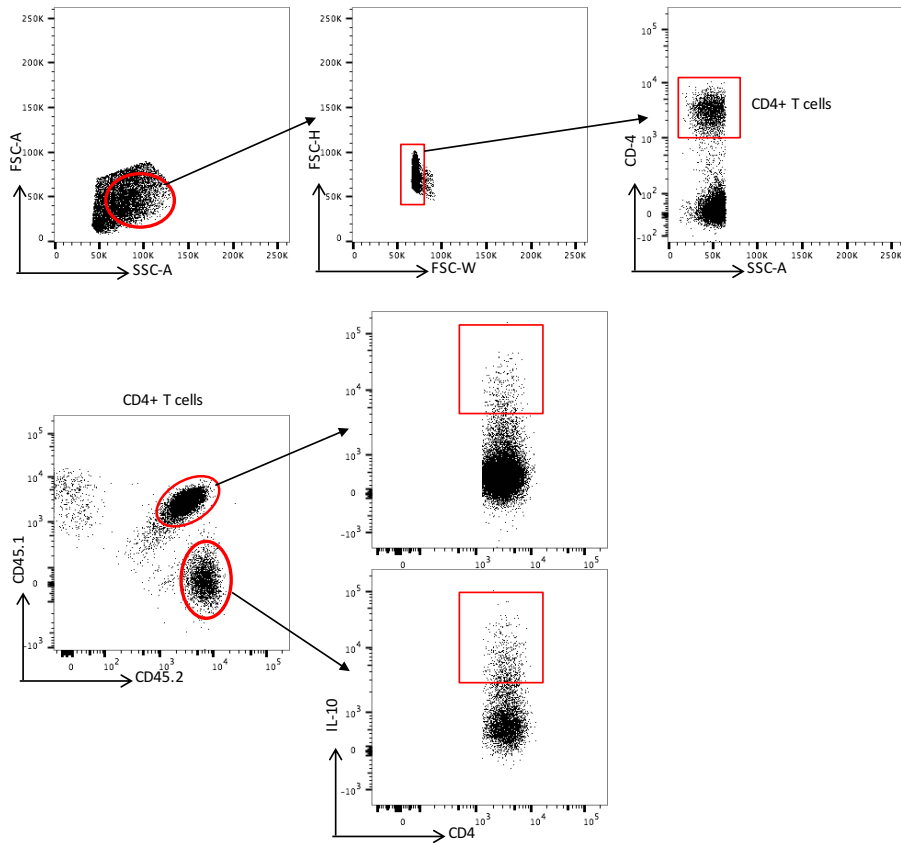

**Supplementary Figure 8. Gating strategy used for analysis of LXRaKO and WT CD4<sup>+</sup> T cells.** Representative gating strategy of indicated populations is depicted in red as used in Figure 5D.

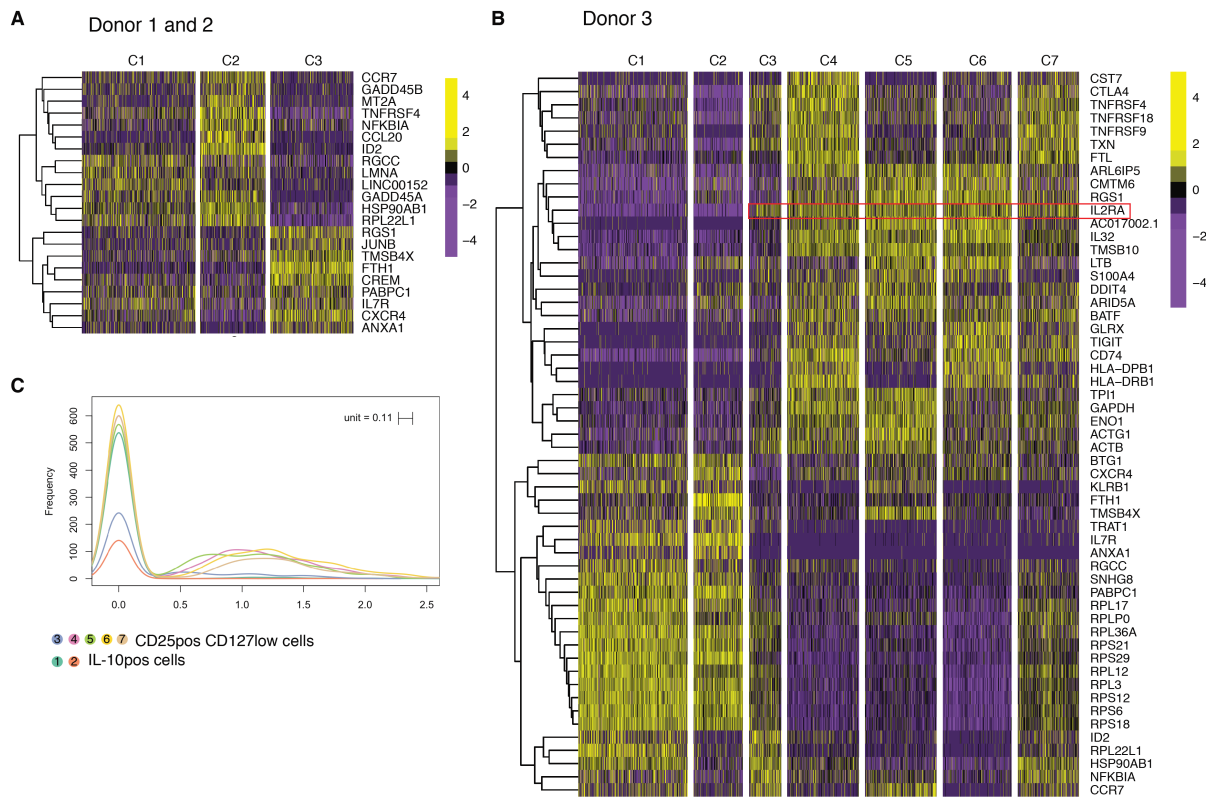

**Supplementary Figure 9. Expression analysis of 10X single cell RNA sequencing of human IL-10-producing CD4<sup>+</sup> T from PBMCs. A) Expression of highly variable genes in every cell in each cluster from donor 1 and 2. B) Expression of highly variable genes in every cell in each cluster from donor 3. C) Expression of *FOXP3* in Cluster 1-7 from donor 3.**

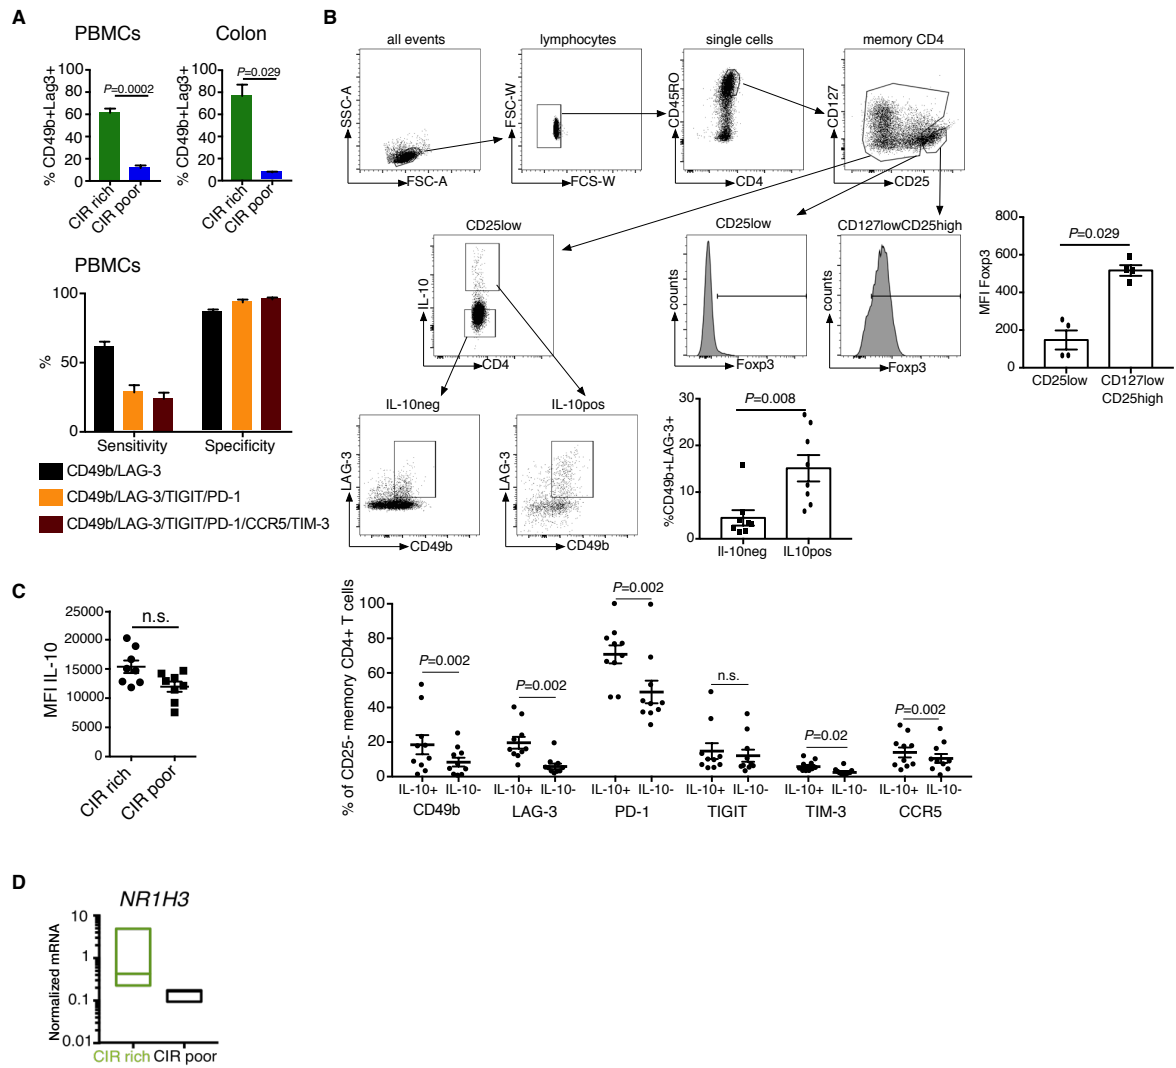

**Supplementary Figure 10. CD49b/LAG-3 expression is strongly enriched within the IL-10-producing CD25<sup>Low</sup> CIR rich subpopulation and FOXP3<sup>+</sup> Treg cells are not contaminating CD25<sup>Low</sup> memory CD4<sup>+</sup> T cells.** **A)** Analysis of CD49b/LAG-3 co-expression in IL-10-producing CIR rich and CIR poor subpopulations in indicated organs. Sensitivity and specificity was calculated for indicated marker combinations in IL-10-producing CD25<sup>Neg</sup> CD4<sup>+</sup> T cells derived from SEB-stimulated PBMCs of healthy donors. **B)** Gating strategy of IL-10-producing CD25<sup>Low</sup> CD4<sup>+</sup> T cells, CD49b/LAG-3 co-expression and expression of FOXP3 in CD4<sup>+</sup> T cells isolated from PBMCs of healthy donors, re-stimulated overnight with SEB. Expression of indicated markers in IL-10-producing and IL-10 negative CD4<sup>+</sup> T cells isolated from PBMCs of healthy donors, re-stimulated overnight with SEB. **C)** PBMCs were isolated from healthy donors (n=8) and stimulated overnight with SEB. IL-10-producing CD25<sup>Low</sup> CIR rich and CIR poor cells were identified using *vi*SNE analysis as displayed in Figure 6B. IL-10 protein levels were assessed within those populations. Data are cumulative of 4 different experiments. **D)** PBMCs were isolated from healthy donors and re-stimulated overnight with 1  $\mu$ g/ml SEB. CD4<sup>+</sup> T cells were enriched using CD4 MACS-beads before sorting. IL-10-producing CD25<sup>Low</sup> CIR rich and CIR poor cells were isolated using FACS. mRNA expression of *NR1H3* normalized to *HPRT* from three independent experiments is shown.

Patient information

|                | Controls (n=18) | UC-remission (n=2) | UC-active (n=22) | CD-remission (n=5) | CD-active (n=9) |
|----------------|-----------------|--------------------|------------------|--------------------|-----------------|
| Sex (F/M)      | 9/9             | 2/0                | 9/13             | 2/3                | 5/4             |
| Age (years)*   | 54.5 +/- 18.1   | 39 +/- 25.5        | 42.8 +/- 15.03   | 43.4 +/- 12.7      | 31.4 +/- 12.8   |
| Involvement UC |                 |                    |                  |                    |                 |
| left-sided     |                 |                    | 5                |                    |                 |
| Distal         |                 |                    | 11               |                    |                 |
| Pancolitis     |                 |                    | 3                |                    |                 |
| Involvement CD |                 |                    |                  |                    |                 |
| SI             |                 |                    |                  |                    | 3               |
| Colon          |                 |                    |                  |                    | 5               |
| SI + colon     |                 |                    |                  |                    | 1               |

\* mean +/- SD

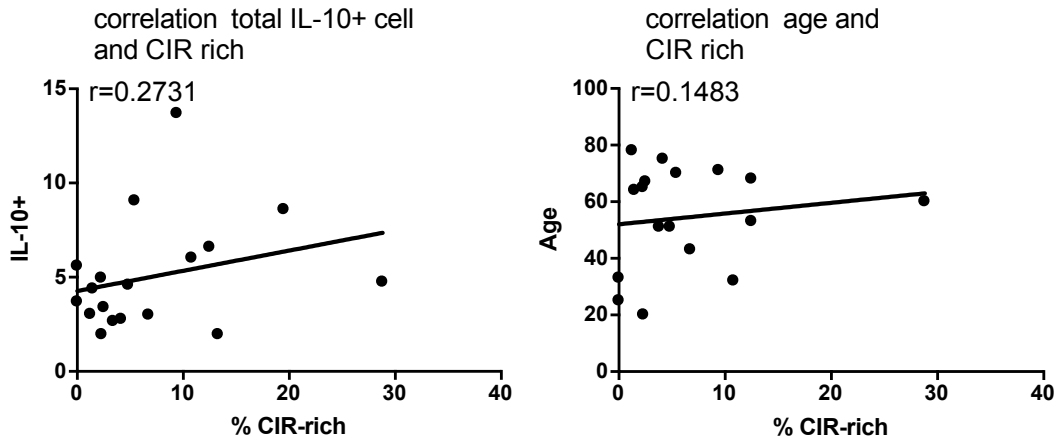

Supplementary Figure 11. Patient information and correlation between CIR rich cells and IL-10 expression and CIR rich cells and age in healthy controls.
